# Supplementary material
Source: HighWire-hosted journal article supplement (https://erj.ersjournals.com/content/56/2/2001534)
Supplement: inline-supplementary-material-1 [file inline-supplementary-material-1.pdf]

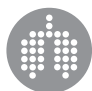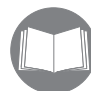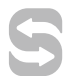

SHAREABLE PDF

# The perpetual enigma of bronchoalveolar lavage fluid lymphocytosis in chronic hypersensitivity pneumonitis: is it of diagnostic value?

Francesco Bonella  and Ulrich Costabel

**Affiliation:** Center for Interstitial and Rare Lung Diseases, Pneumology Department, Ruhrlandklinik University Hospital, University of Duisburg-Essen, Essen, Germany.

**Correspondence:** Francesco Bonella, Ruhrlandklinik University Hospital, Tüschener Weg 40 45239 Essen, Germany. E-mail: Francesco.bonella@rlk.uk-essen.de

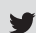

@ERSpublications

**A marked increase in BAL lymphocyte percentage is of additional value in distinguishing cHP from other forms of fibrotic ILD** <https://bit.ly/3ciR8zG>

**Cite this article as:** Bonella F, Costabel U. The perpetual enigma of bronchoalveolar lavage fluid lymphocytosis in chronic hypersensitivity pneumonitis: is it of diagnostic value? *Eur Respir J* 2020; 56: 2001534 [<https://doi.org/10.1183/13993003.01534-2020>].

This single-page version can be shared freely online.

Since its introduction in the 1970s, bronchoalveolar lavage (BAL) has been increasingly recognised as a low-risk investigational tool, providing information of diagnostic and, potentially, prognostic value in several fields of pulmonary medicine, especially in interstitial lung disease (ILD) [1]. In some ultrarare ILDs, such as pulmonary alveolar proteinosis, BAL findings are highly specific and diagnostic, whereas in the more common ILDs they are nonspecific and cannot provide a confident diagnosis as a standalone test. However, when BAL cellular analysis is interpreted in the context of clinical and high-resolution computed tomography (HRCT) findings and in an experienced multidisciplinary discussion (MDD) setting, it may contribute to narrowing the differential diagnosis and help to avoid surgical lung biopsy.
